# Supplementary material for: Thermally-induced spin-crossover (SCO) in Fe(4-ethynylpyrdine)2[Fe(CN)5NO]. Why is the SCO observed in 2D ferrous nitroprussides despite the NO–NC repulsive interaction in the interlayer region?
Source: Royal Society of Chemistry journal article supplement (doi:10.1039/d3nj04638a), 2023-01-01
Supplement: d3nj04638a1.pdf [file d3nj04638a1.pdf]

Supporting Information for *“Thermally-induced spin-crossover (SCO) in Fe(4-Ethynylpyridine)<sub>2</sub>[Fe(CN)<sub>5</sub>NO]. Why is the SCO observed in 2D ferrous nitroprussides despite the NO-NC repulsive interaction in the interlayer region?”* by Karla Scanda, Yosuan Avila, Laritza Sánchez, Rodrigo Mojica, Marlene González, Beatriz D. Moreno, Manuel Avila, and Edilso Reguera.

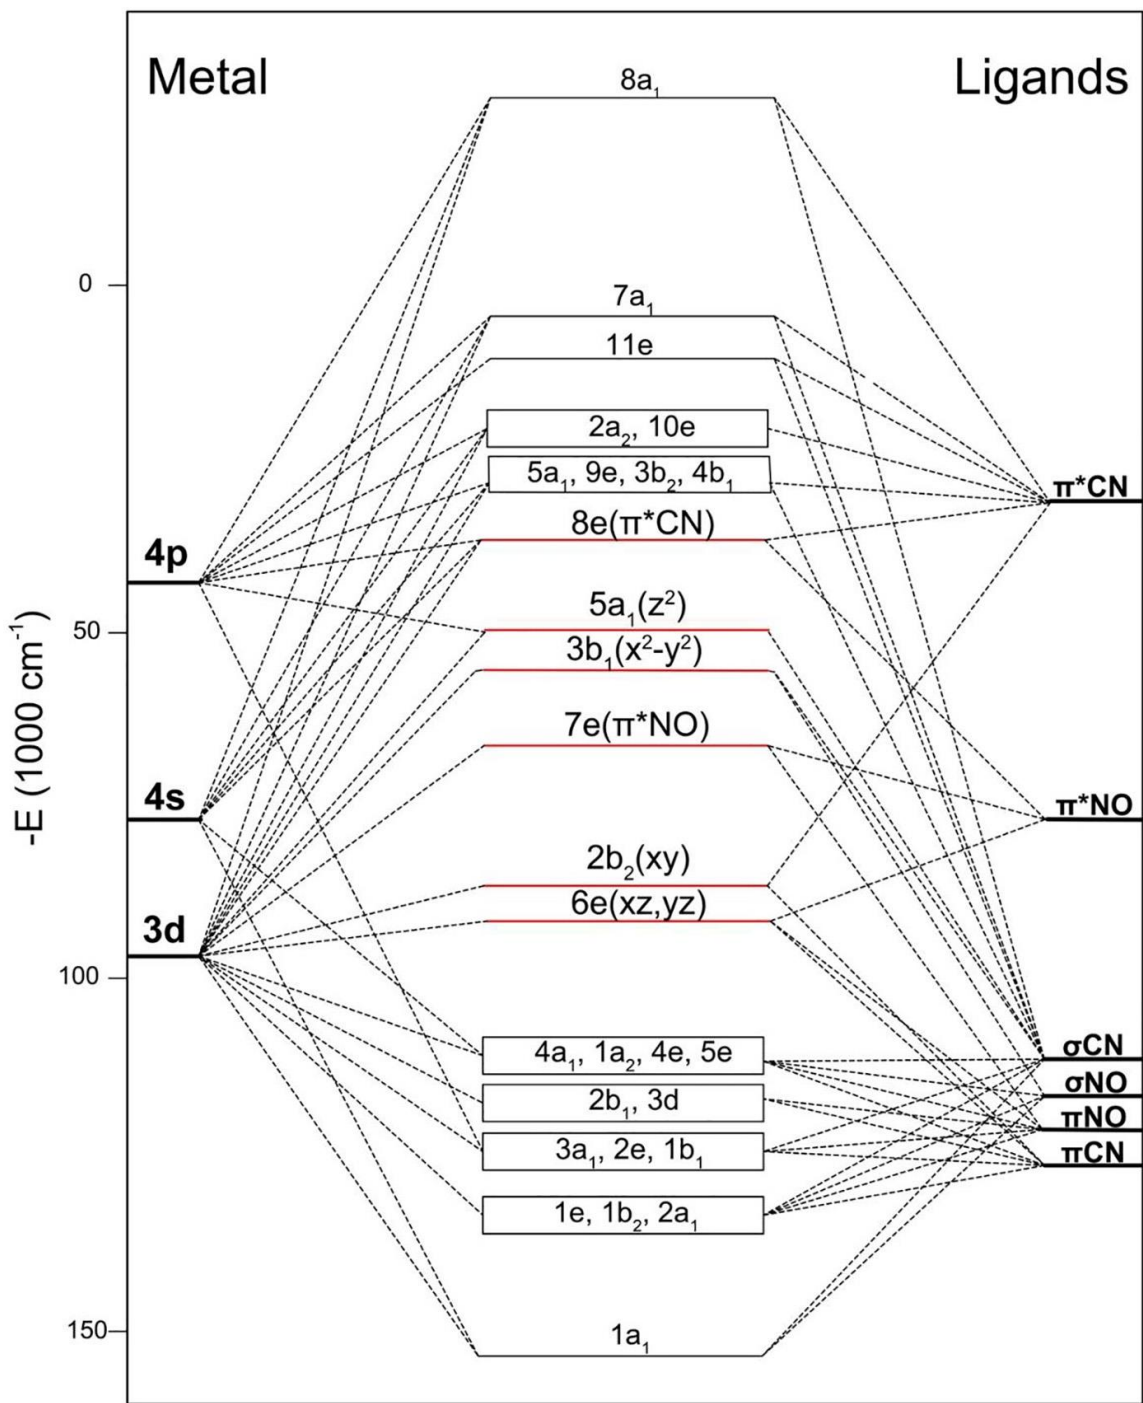

Figure S1. Molecular orbital energy levels for nitroprusside ion,  $[\text{Fe}(\text{CN})_5\text{NO}]^{2-}$ . Reproduced from P.T. Manoharan, H.B. Gray, J. Am. Chem. Soc. 87 (1965) 3340.

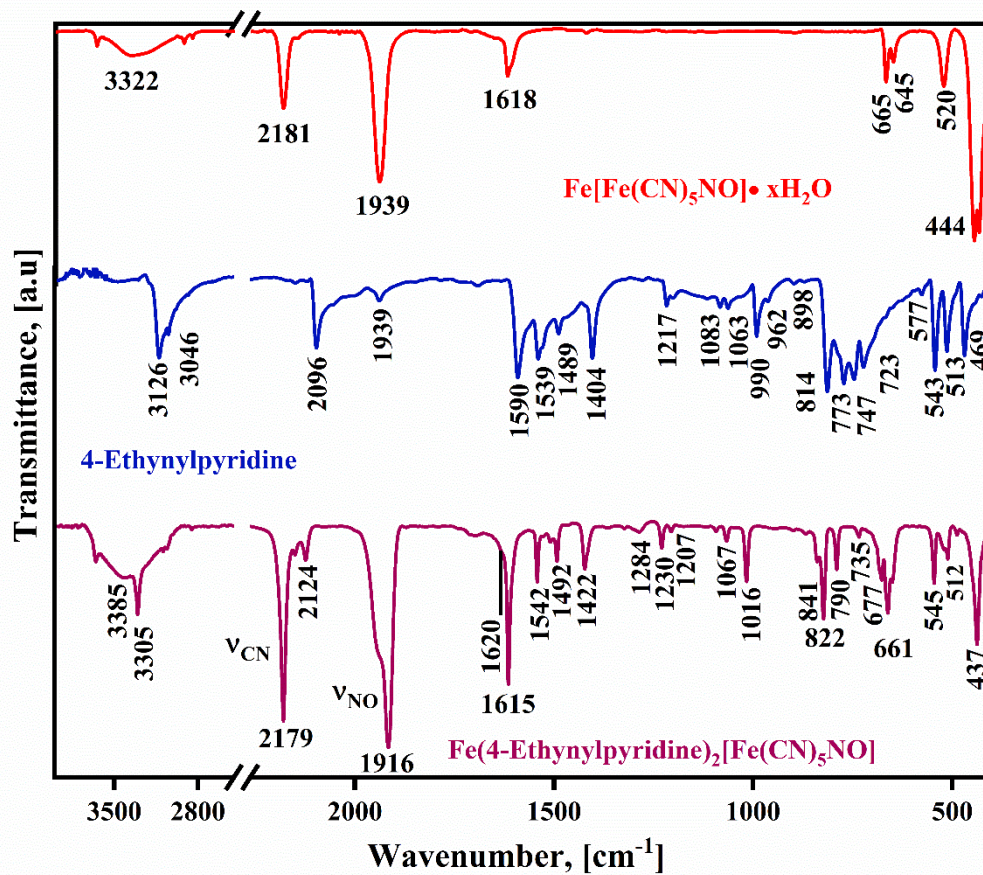

Figure S2. IR spectra of ferrous nitroprusside (3D cubic phase), 4-Ethynylpyridine, and the solid formed by sonicating a suspension of 3D ferrous nitroprusside and the molecule in a 1:2 molar ratio.

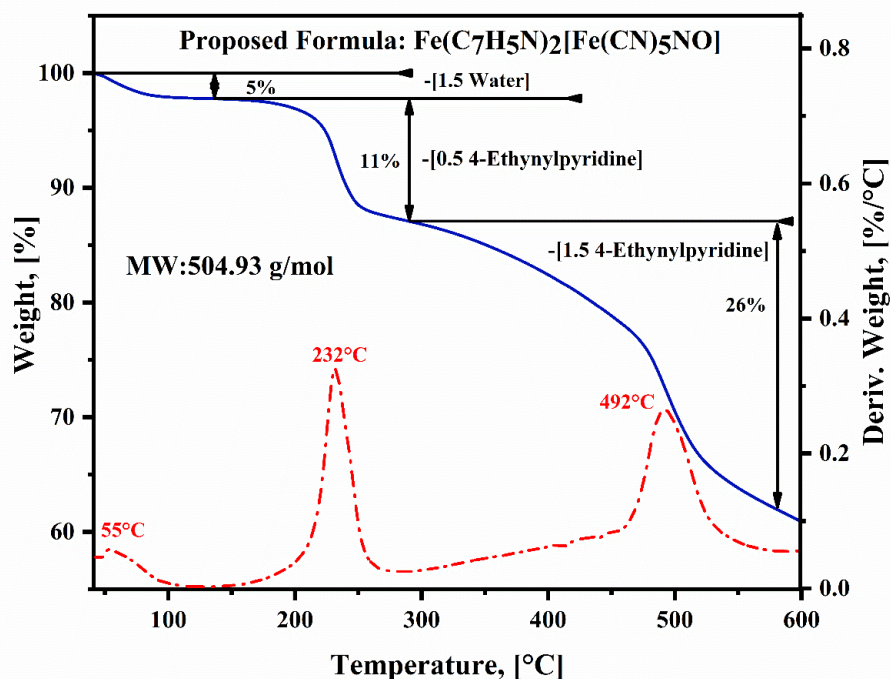

Figure S3. TG curves of IR spectra of ferrous nitroprusside (3D cubic phase), 4-Ethynylpyridine, and the solid formed by sonicating a suspension of 3D ferrous nitroprusside and the molecule in a 1:2 molar ratio.

Table S1. Frequency for the main characteristic IR absorption bands of  $\text{Fe}(4\text{-EPy})_2[\text{Fe}(\text{CN})_5\text{NO}]$  at 298 K.

| TA   | 77 K | Assignment                                            |
|------|------|-------------------------------------------------------|
| 3305 | 3310 | $\nu(\text{C-H})$ EPy                                 |
| 2179 | 2188 | $\nu(\text{C}\equiv\text{N})$ $\text{CN}_{\text{Eq}}$ |
| 1911 | 1916 | $\nu(\text{N}=\text{O})$ Nitrop.                      |
| 1615 | 1618 | $\nu(\text{C-C})$ EPy                                 |
| 1542 | 1542 | $\nu(\text{CN})_{\text{ring}}$ EPy                    |
| 1016 | 1023 | $\nu, \rho$ (ring) EPy                                |
| 822  | 824  | $\omega$ (ring) EPy                                   |
| 661  | 661  | $\delta(\text{H-C-C})$ EPy                            |
| 545  | 552  | $\delta[\text{Fe-C}\equiv\text{N}_{\text{Eq}}]$       |

Table S2. Results for the elemental chemical analysis for the material under study as an anhydrous phase.

| Sample                                                                       | %Fe   |       | %C    |       | %N    |       | %O   |      | %H   |      |
|------------------------------------------------------------------------------|-------|-------|-------|-------|-------|-------|------|------|------|------|
|                                                                              | Cal.  | Exp.  | Cal.  | Exp.  | Cal.  | Exp.  | Cal. | Exp. | Cal. | Exp. |
| $\text{Fe}(\text{C}_7\text{H}_5\text{N})_2[\text{Fe}(\text{CN})_5\text{NO}]$ | 28.35 | 28.40 | 36.58 | 36.23 | 28.44 | 28.37 | 4.06 | 4.11 | 2.55 | 2.59 |

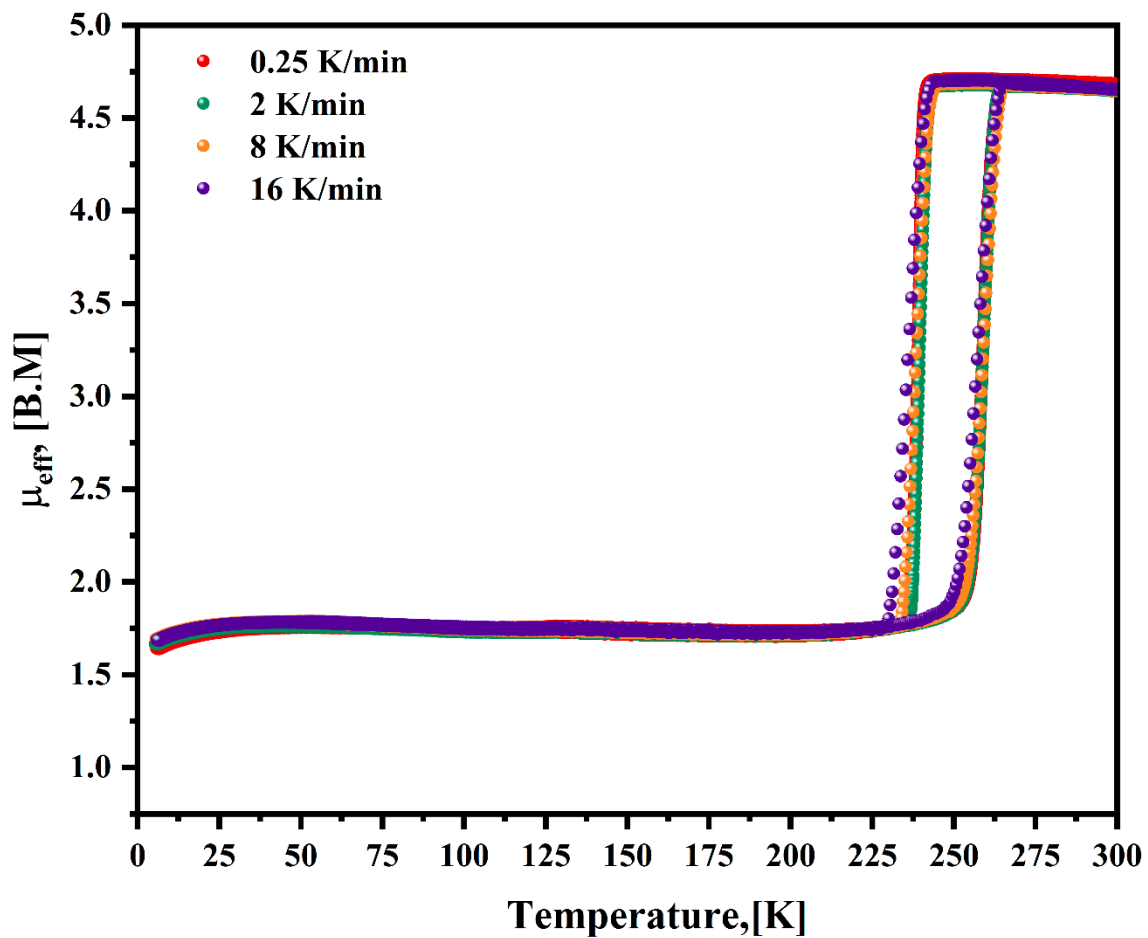

Figure S4. Effective magnetic moment ( $\mu_{\text{eff}}$ ) versus temperature of  $\text{Fe}(\text{4EPy})_2[\text{Fe}(\text{CN})_5\text{NO}]$ , from magnetic data recorded at different values of scan rate in the 6 to 300 K temperature range. Below 25 K, the remaining paramagnetic iron(II) atoms are participating in a weak antiferromagnetic interaction.

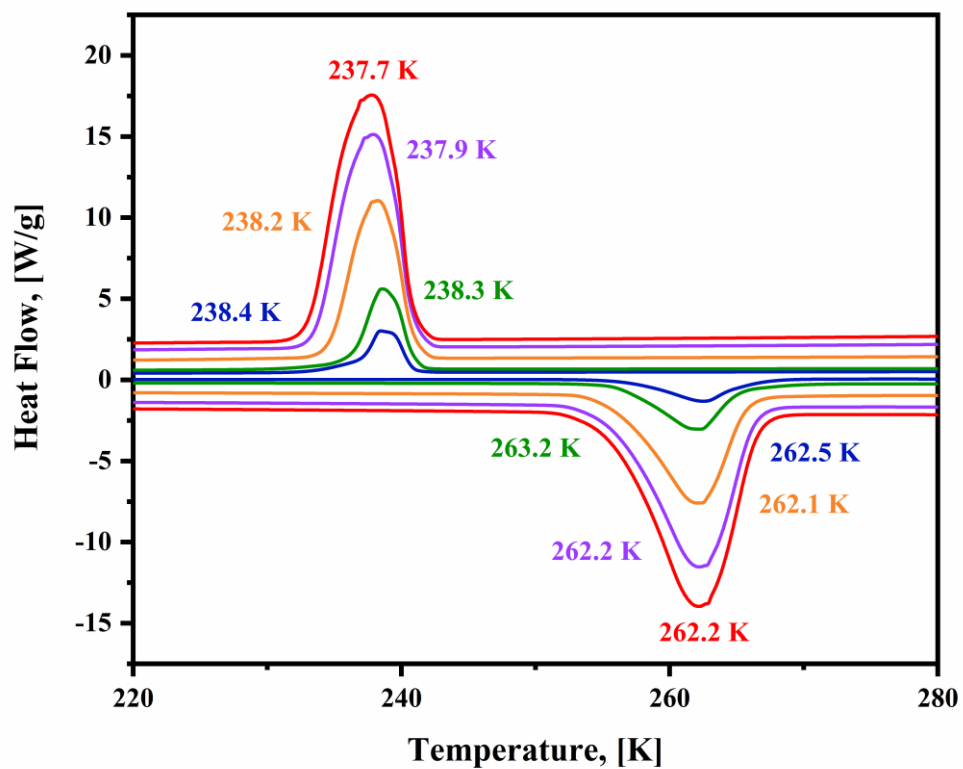

Figure S5. DSC curves of  $\text{Fe}(4\text{-EPy})_2[\text{Fe}(\text{CN})_5\text{NO}]$  using different scan rates, in the temperature region where the spin transitions were observed.

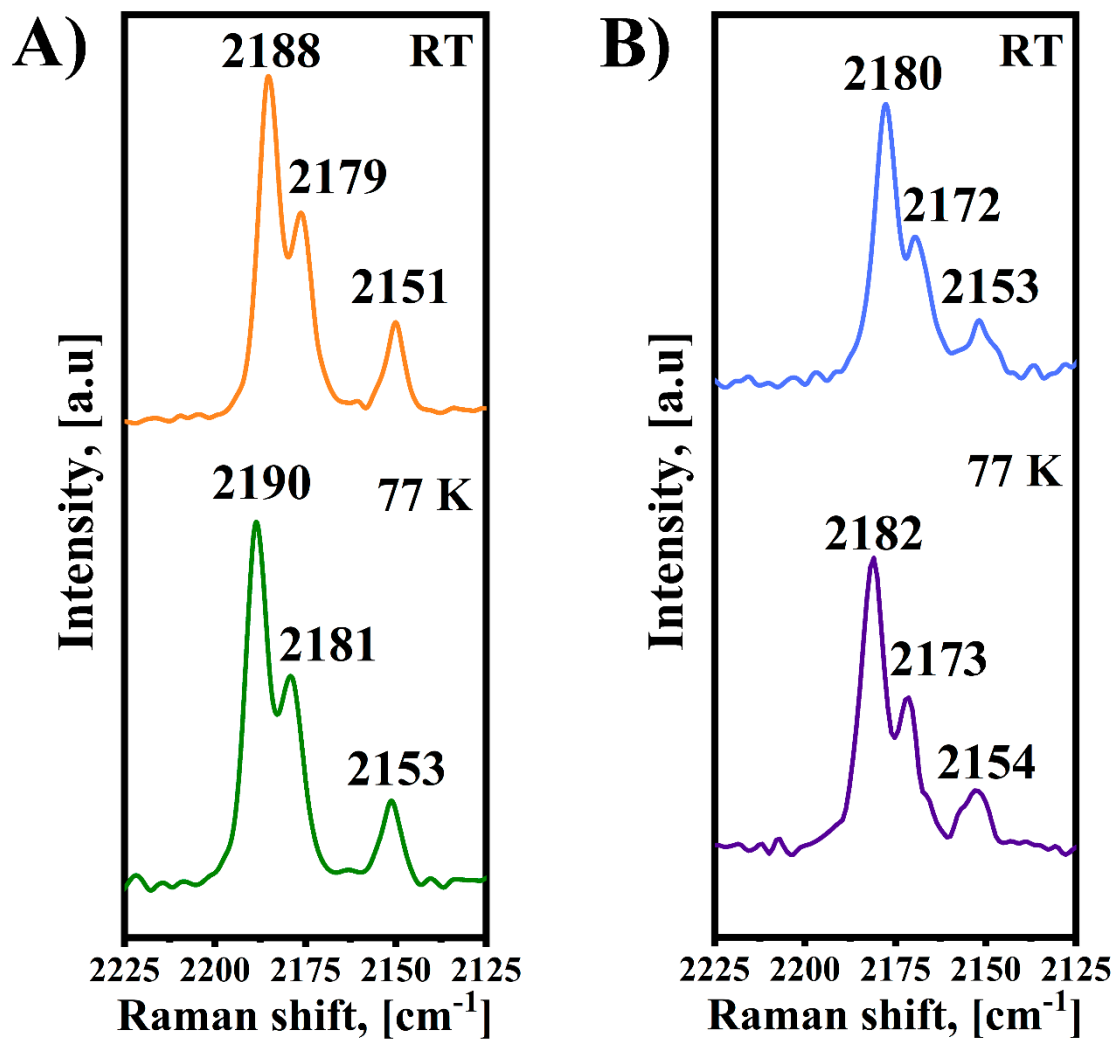

Figure S6.  $\nu(\text{CN})$  stretching spectral region of the Raman spectra recorded at 77 and 298 K for two pillared ferrous nitroprussides without spin-crossover. A) 3D material:  $\text{Fe}(\text{1,2-Bis}(4\text{-Pyridyl})\text{ethane})_2[\text{Fe}(\text{CN})_5\text{NO}]$  and B) 2D material:  $\text{Fe}(4\text{-Phenylpyridine})_2[\text{Fe}(\text{CN})_5\text{NO}]$ .

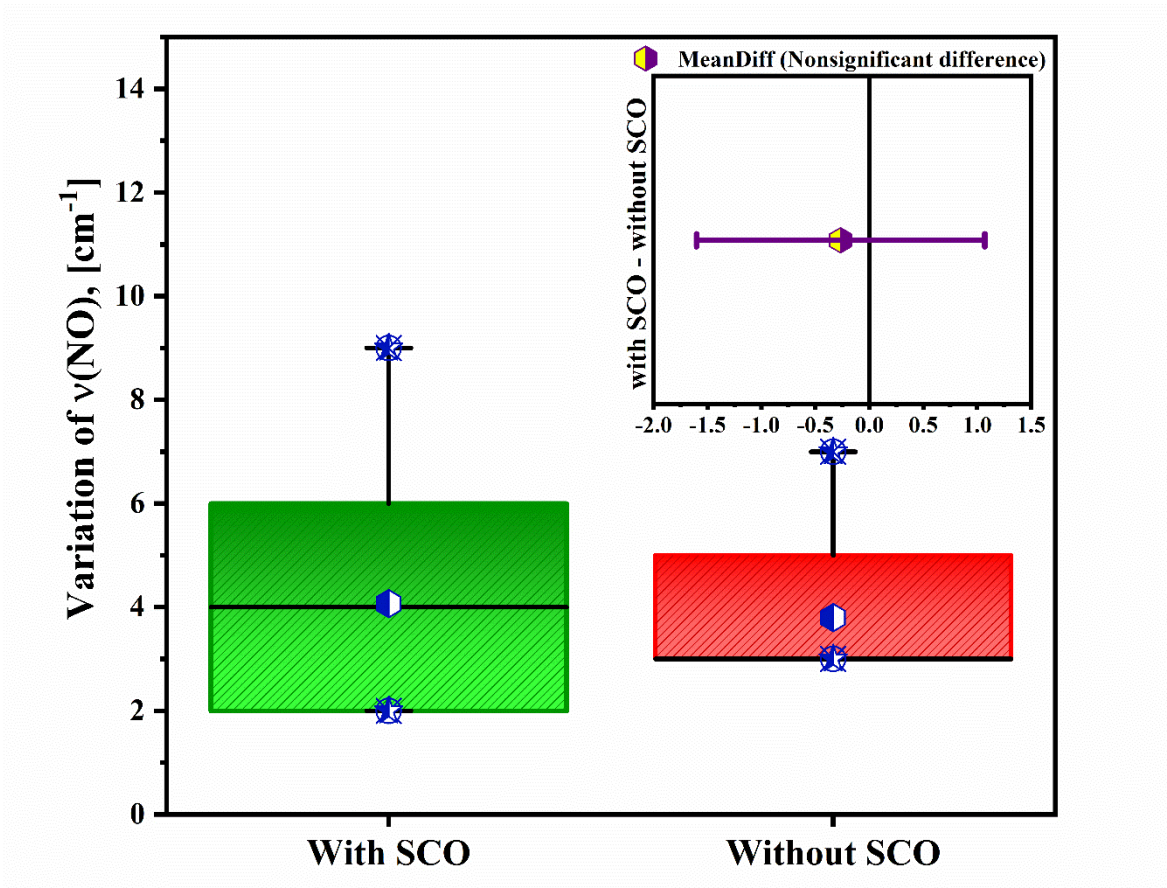

Figure S7. ANOVA analysis of the variation of  $\nu(\text{NO})$  in pillared 2D ferrous nitroprussides with and without spin crossover.



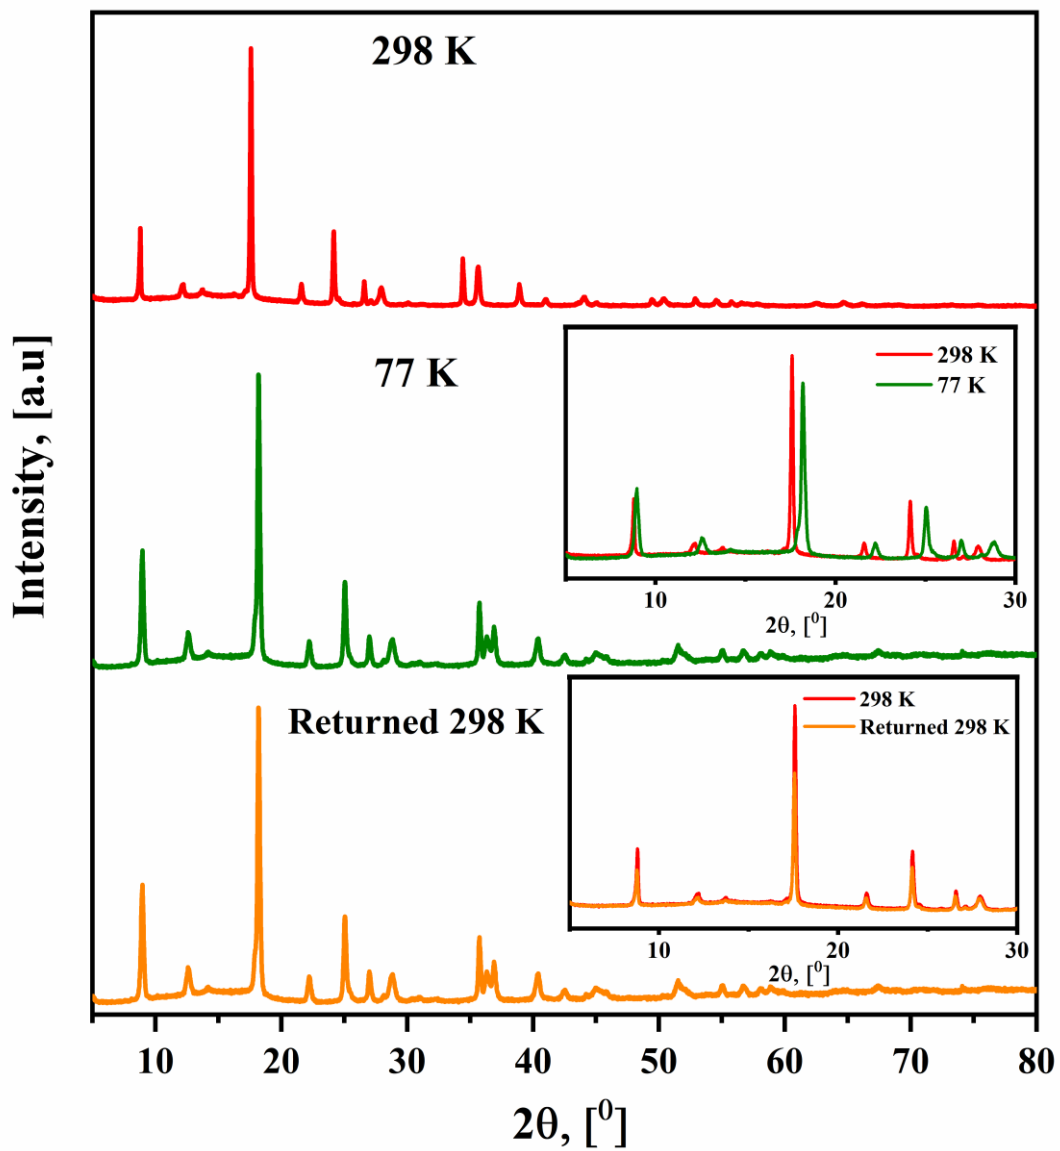

Figure S8. PXRD patterns for  $\text{Fe}(\text{4EPy})_2[\text{Fe}(\text{CN})_5\text{NO}]$  recorded at 298 K, 77 K, and then on the sample warming to room temperature (298 K). These patterns were recorded with  $\text{CuK}\alpha$  radiation using a D8 Advance diffractometer from Bruker.

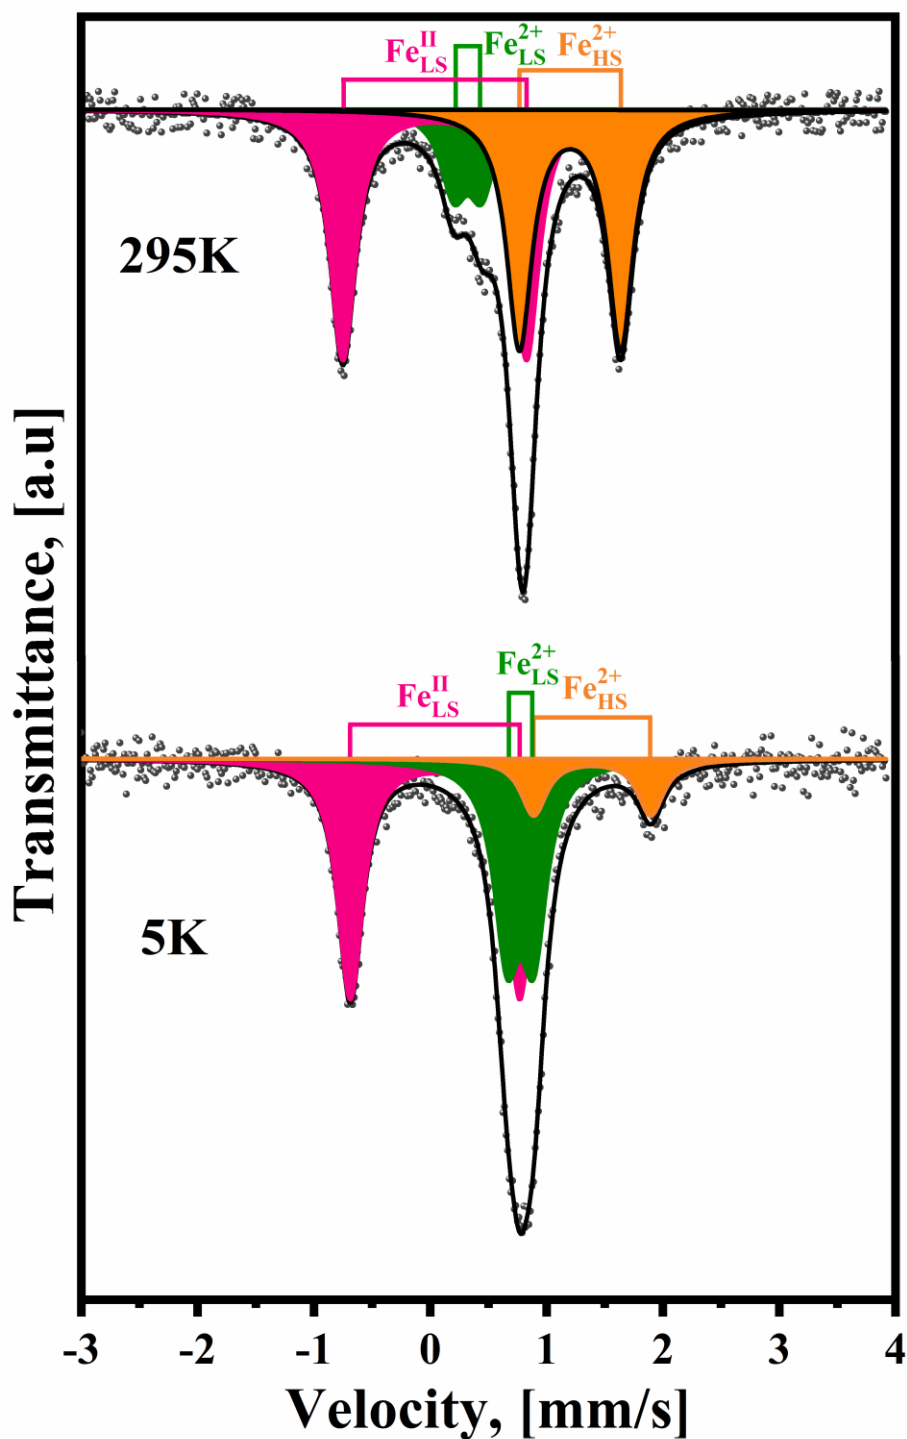

Figure S9. Mössbauer spectra recorded at 295 and 5 K of the  $\text{Fe}(\text{Quinazoline})_2[\text{Fe}(\text{CN})_5\text{NO}]$ . Labels: A:  $\text{Fe}^{\text{II}}_{\text{LS}}$ : low spin iron atom (II) in the  $[\text{Fe}(\text{CN})_5\text{NO}]$  block; B:  $\text{Fe}^{\text{II}}_{\text{HS}}$ : high spin iron atom (II) with  $\text{Fe}(\text{NC})_4(\text{N}_L)_2$  coordination environment; C:  $\text{Fe}^{\text{II}}_{\text{LS}}$ : low spin iron atom (II) with  $\text{Fe}(\text{NC})_4(\text{N}_L)_2$  coordination.  $\Delta_{\text{QS}}$  (295 K) = 1.578 mm/s;  $\Delta_{\text{QS}}$  (5 K) = 1.457 mm/s;  $\delta$  (295 K) = 0.040 mm/s and  $\delta$  (5 K) = 0.041 mm/s. This material shows an incomplete HS  $\rightarrow$  LS transition on the sample cooling.

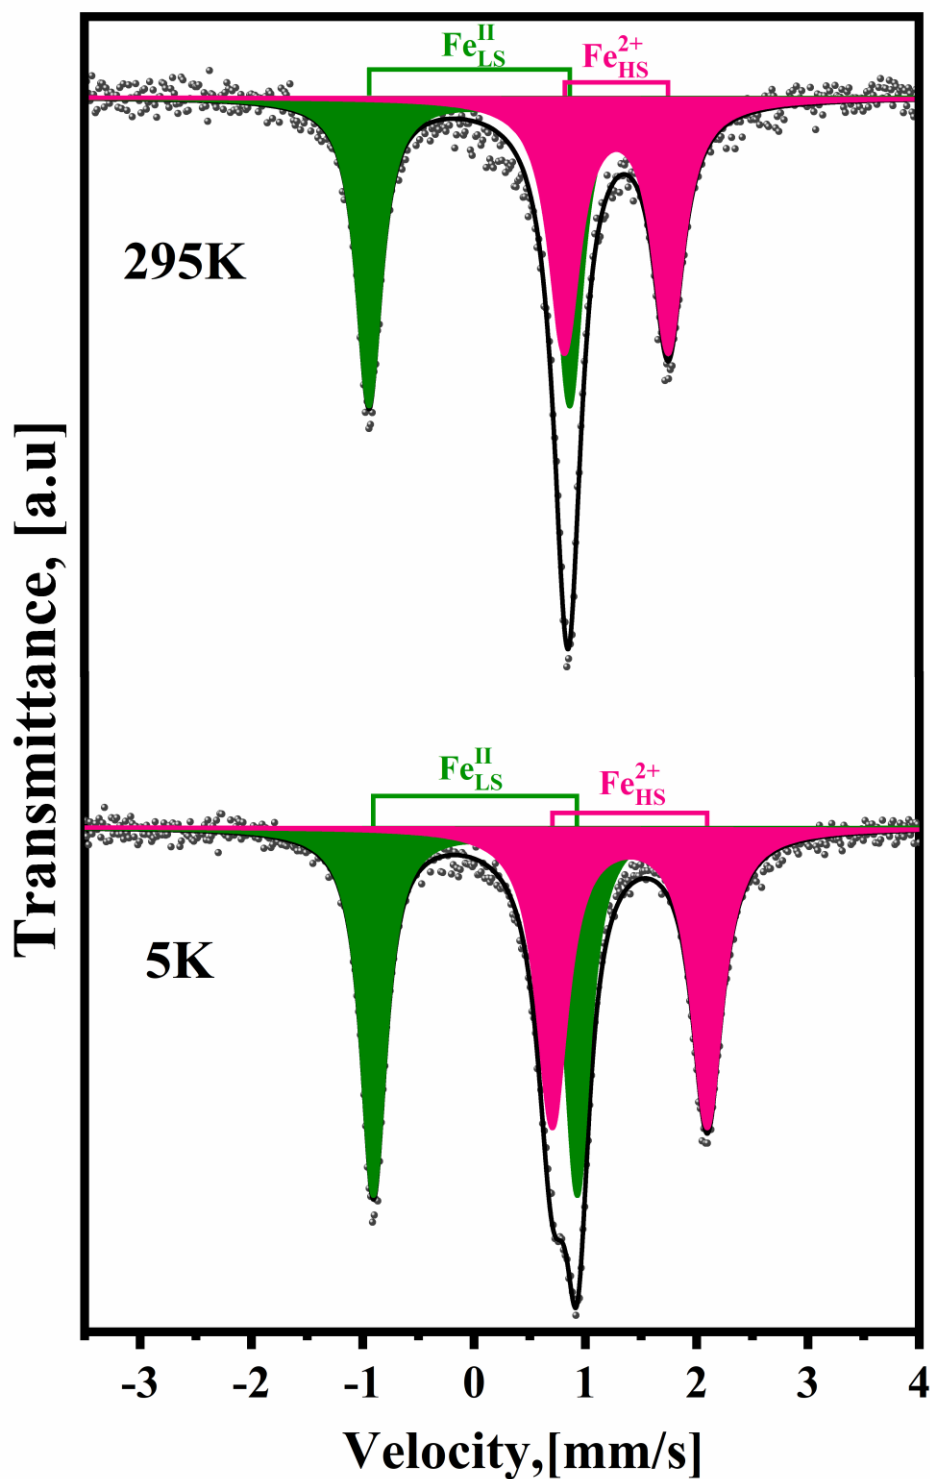

Figure S10. Mössbauer spectra recorded at 295 and 5 K of the  $\text{Fe}(\text{4-Phenylpyridine})_2[\text{Fe}(\text{CN})_5\text{NO}]$ . Labels: A:  $\text{Fe}^{\text{II}}_{\text{LS}}$ : low spin iron atom (II) in the  $[\text{Fe}(\text{CN})_5\text{NO}]$  block and B:  $\text{Fe}^{\text{II}}_{\text{HS}}$ : high spin iron atom (II) with  $\text{Fe}(\text{NC})_4(\text{N}_i)_2$  coordination environment. This material is free of HS  $\rightarrow$  LS transition on the sample cooling.

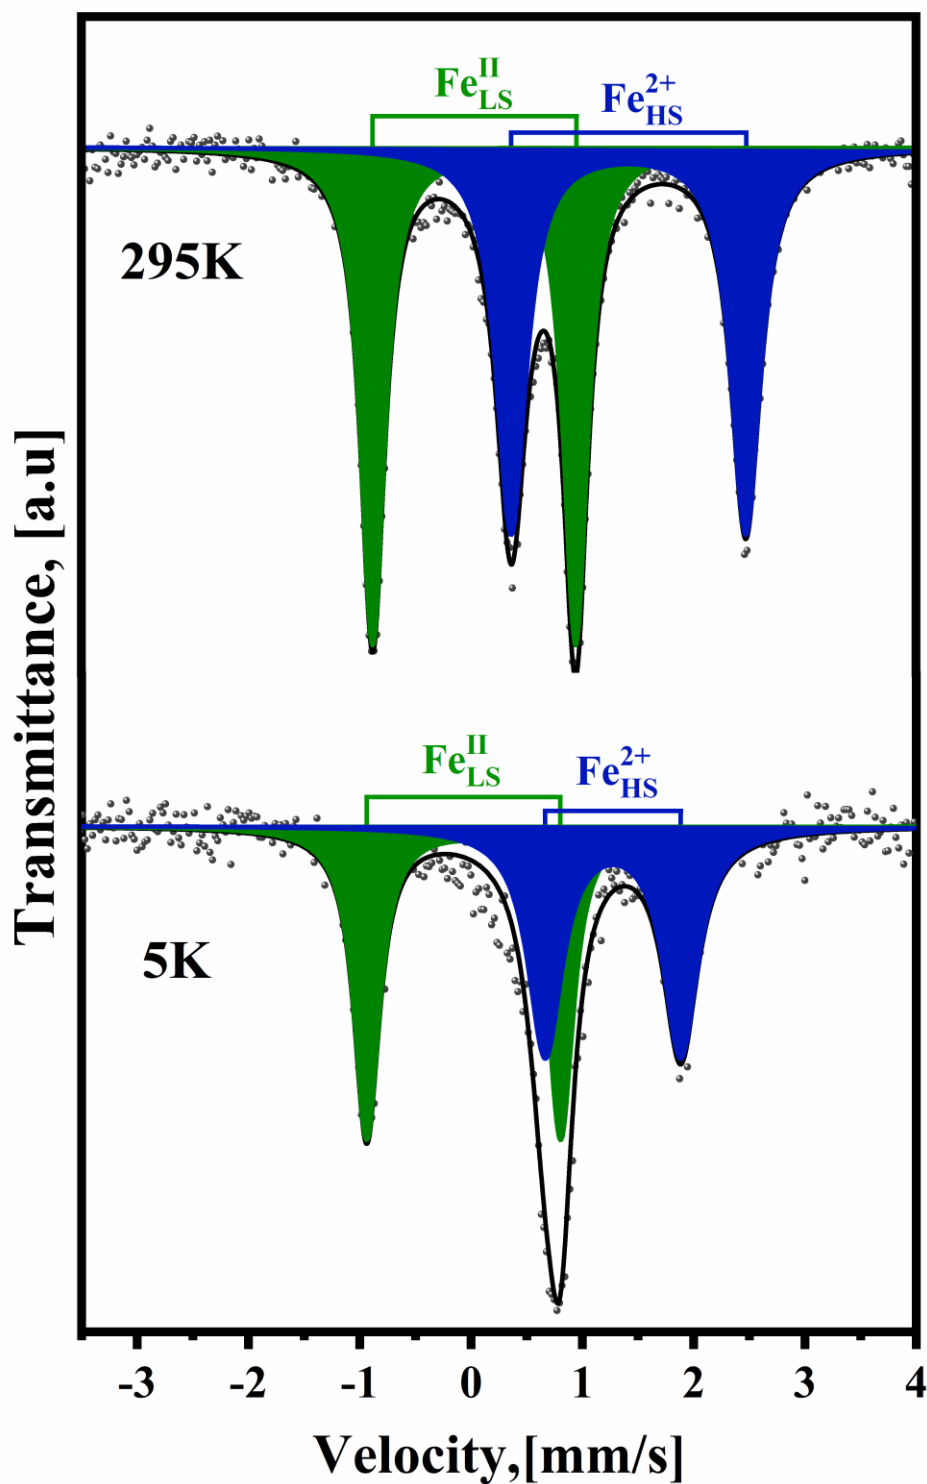

Figure S11. Mössbauer spectra recorded at 295 and 5 K of the  $\text{Fe}(\text{4-Styrylpyridine})_2[\text{Fe}(\text{CN})_5\text{NO}]$ . Labels: A:  $\text{Fe}^{\text{II}}_{\text{LS}}$ : low spin iron atom (II) in the  $[\text{Fe}(\text{CN})_5\text{NO}]$  block and B:  $\text{Fe}^{\text{II}}_{\text{HS}}$ : high spin iron atom (II) with  $\text{Fe}(\text{NC})_4(\text{N}_i)_2$  coordination environment. This material is free of  $\text{HS} \rightarrow \text{LS}$  transition on the sample cooling.

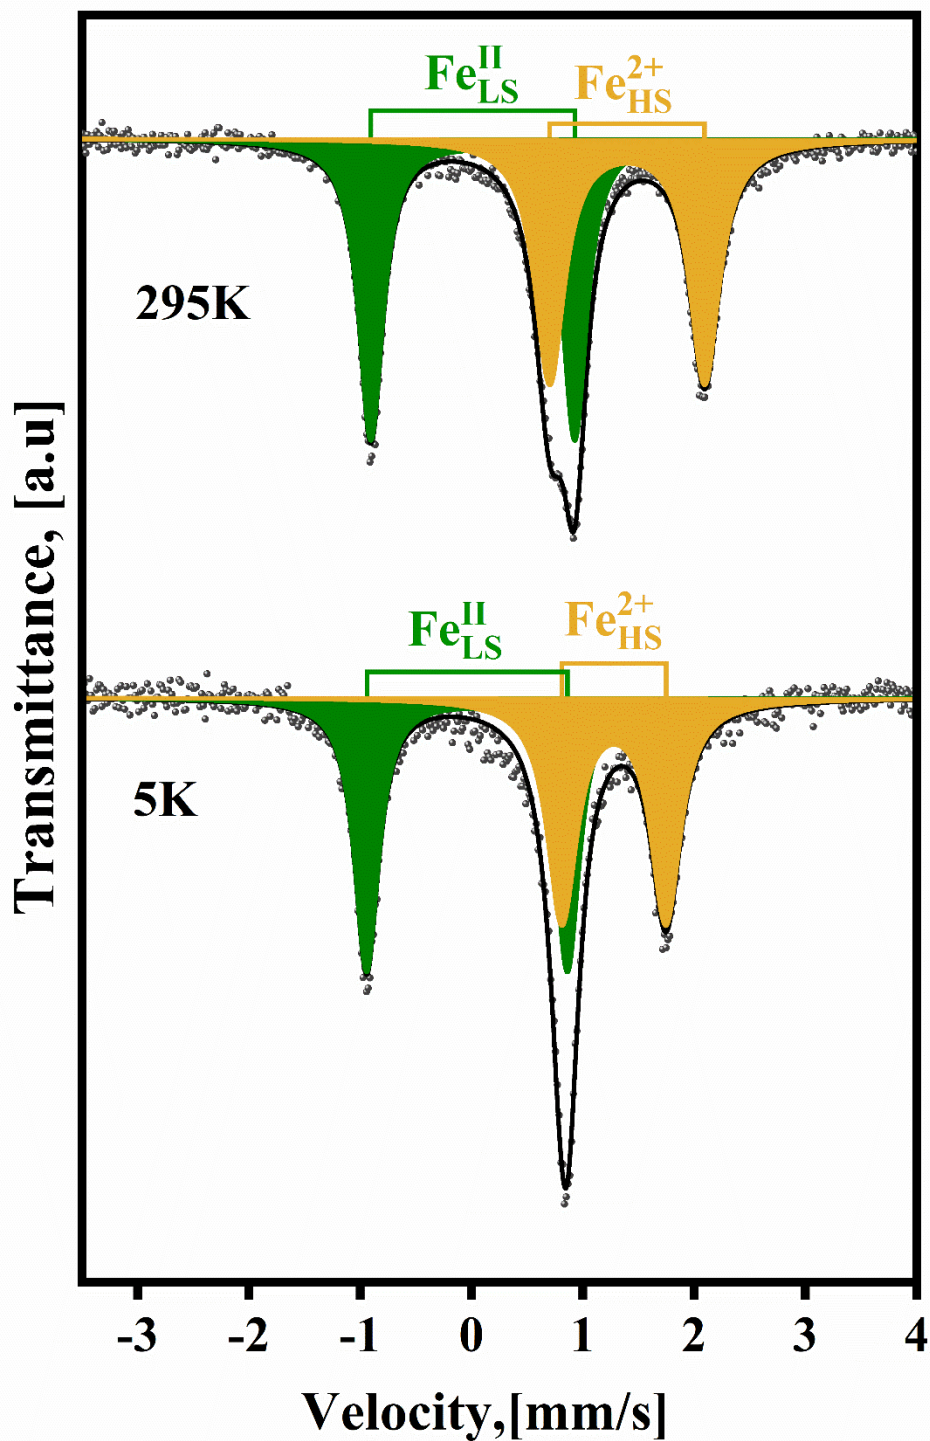

Figure S12. Mössbauer spectra recorded at 295 and 5 K of the  $\text{Fe}(1,10\text{-Phenanthroline})_2[\text{Fe}(\text{CN})_5\text{NO}]$ . Labels: A:  $\text{Fe}^{\text{II}}_{\text{LS}}$ : low spin iron atom (II) in the  $[\text{Fe}(\text{CN})_5\text{NO}]$  block and B:  $\text{Fe}^{\text{II}}_{\text{HS}}$ : high spin iron atom (II) with  $\text{Fe}(\text{NC})_4(\text{N})_2$  coordination environment. This material is free of  $\text{HS} \rightarrow \text{LS}$  transition on the sample cooling.

Table S3. Details of the refined crystal structure by the Rietveld method.

| Composition                             | Fe(4-EPy) <sub>2</sub> [Fe(CN) <sub>5</sub> NO]<br>at 293 K                    | Fe(4-EPy) <sub>2</sub> [Fe(CN) <sub>5</sub> NO]<br>190 K |
|-----------------------------------------|--------------------------------------------------------------------------------|----------------------------------------------------------|
| <b>Data collection</b>                  |                                                                                |                                                          |
| Diffractometer                          | magnet beamline 08B1-1 Pilatus3 S 6M detector                                  |                                                          |
| Wavelength (Å)                          | 18 keV ( $\lambda = 0.6868$ Å)                                                 |                                                          |
| 2 $\theta$ range (°)                    | 5.06141- 50.00475                                                              |                                                          |
| <b>Crystal data</b>                     |                                                                                |                                                          |
| Empirical formula                       | Fe <sub>4</sub> C <sub>38</sub> N <sub>16</sub> O <sub>2</sub> H <sub>28</sub> |                                                          |
| Empirical formula weight                | 964.133 g/mol                                                                  |                                                          |
| Crystal system                          | Orthorhombic                                                                   |                                                          |
| Space group                             | C m m m (65)                                                                   |                                                          |
| Unit cell dimensions                    | a = 20.1476(10) Å                                                              | a=19.7722(10) Å                                          |
|                                         | b = 7.3815(10) Å                                                               | b=7.104(1) Å                                             |
|                                         | c = 7.3601(10) Å                                                               | c=7.0932(10) Å                                           |
|                                         | a/b=2.7295                                                                     | a/b=2.7832                                               |
|                                         | b/c=1.0029 c/a=0.3653                                                          | b/c=1.0015 c/a=0.3587                                    |
| Volume (Å <sup>3</sup> )                | 1094.59(22)                                                                    | 996.32(20)                                               |
| Z                                       | 2                                                                              |                                                          |
| Calculated Density (g/cm <sup>3</sup> ) | 1.46254                                                                        |                                                          |

Table S4. Atomic coordinates, isotropic thermal factors, and occupation factors for the refined crystal structures.

| Atom                                                       | Ox. | Wyck. | Site | S.O.F. | x/a      | y/b     | z/c      | U [Å <sup>2</sup> ] |
|------------------------------------------------------------|-----|-------|------|--------|----------|---------|----------|---------------------|
| <b>Fe(4EPy)<sub>2</sub>[Fe(CN)<sub>5</sub>NO] at 293 K</b> |     |       |      |        |          |         |          |                     |
| Fe1                                                        |     | 2d    | mmm  |        | 0        | 0       | 1/2      | 0.0390              |
| Fe2                                                        |     | 2b    | mmm  |        | 0        | 1/2     | 0        | 0.0410              |
| C1                                                         |     | 8n    | m..  |        | 0        | 0.17410 | 0.30330  | 0.0500              |
| N1                                                         |     | 8n    | m..  |        | 0        | 0.27800 | 0.18990  | 0.0500              |
| C2                                                         |     | 4h    | 2mm  | 0.5    | -0.09620 | 0       | 1/2      | 0.0500              |
| N2                                                         |     | 4h    | 2mm  | 0.5    | -0.15250 | 0       | 1/2      | 0.0500              |
| N3                                                         |     | 4h    | 2mm  | 0.5    | -0.08430 | 0       | 1/2      | 0.0500              |
| O1                                                         |     | 4h    | 2mm  | 0.5    | -0.14000 | 0       | 1/2      | 0.0500              |
| N4                                                         |     | 4g    | 2mm  |        | 0.09170  | 1/2     | 0        | 0.0450              |
| C3                                                         |     | 8o    | .m.  |        | 0.12360  | 1/2     | -0.17580 | 0.0540              |
| H3                                                         |     | 8o    | .m.  |        | 0.09900  | 1/2     | -0.27740 | 0.0000              |
| C4                                                         |     | 8o    | .m.  |        | 0.19240  | 1/2     | -0.18370 | 0.0540              |
| H4                                                         |     | 8o    | .m.  | 2      | 0.21430  | 1/2     | -0.29080 | 0.0000              |
| C5                                                         |     | 4g    | 2mm  |        | 0.22850  | 1/2     | 0        | 0.0540              |
| C6                                                         |     | 4g    | 2mm  |        | 0.29970  | 1/2     | 0        | 0.0540              |
| C7                                                         |     | 4g    | 2mm  |        | 0.35980  | 1/2     | 0        | 0.0540              |
| H7                                                         |     | 4g    | 2mm  |        | 0.40610  | 1/2     | 0        | 0.0000              |

| Fe(4EPy) <sub>2</sub> [Fe(CN) <sub>5</sub> NO] at 190 K |  |    |     |     |          |         |          |        |
|---------------------------------------------------------|--|----|-----|-----|----------|---------|----------|--------|
| Fe1                                                     |  | 2d | mmm |     | 0        | 0       | 1/2      | 0.0390 |
| Fe2                                                     |  | 2b | mmm |     | 0        | 1/2     | 0        | 0.0410 |
| C1                                                      |  | 8n | m.. |     | 0        | 0.18040 | 0.29610  | 0.0500 |
| N1                                                      |  | 8n | m.. |     | 0        | 0.28840 | 0.17830  | 0.0500 |
| C2                                                      |  | 4h | 2mm | 0.5 | -0.09790 | 0       | 1/2      | 0.0500 |
| N2                                                      |  | 4h | 2mm | 0.5 | -0.15530 | 0       | 1/2      | 0.0500 |
| N3                                                      |  | 4h | 2mm | 0.5 | -0.08540 | 0       | 1/2      | 0.0500 |
| O1                                                      |  | 4h | 2mm | 0.5 | -0.14180 | 0       | 1/2      | 0.0500 |
| N4                                                      |  | 4g | 2mm |     | 0.09170  | 1/2     | 0        | 0.0450 |
| C3                                                      |  | 8o | .m. |     | 0.12360  | 1/2     | -0.17580 | 0.0540 |
| H3                                                      |  | 8o | .m. |     | 0.09900  | 1/2     | -0.27740 | 0.0000 |
| C4                                                      |  | 8o | .m. |     | 0.19240  | 1/2     | -0.18370 | 0.0540 |
| H4                                                      |  | 8o | .m. |     | 0.21430  | 1/2     | -0.29080 | 0.0000 |
| C5                                                      |  | 4g | 2mm |     | 0.22850  | 1/2     | 0        | 0.0540 |
| C6                                                      |  | 4g | 2mm |     | 0.29970  | 1/2     | 0        | 0.0540 |
| C7                                                      |  | 4g | 2mm |     | 0.35980  | 1/2     | 0        | 0.0540 |
| H7                                                      |  | 4g | 2mm |     | 0.40610  | 1/2     | 0        | 0.0000 |
| Fe1                                                     |  | 2d | mmm |     | 0        | 0       | 1/2      | 0.0390 |

Table S5: Selected bond distances and angles for the refined crystal structures.

| Composition                                                | Atoms  | Bond distance (Å) | Atoms     | Bond angle (°) |
|------------------------------------------------------------|--------|-------------------|-----------|----------------|
| Fe(4EPy) <sub>2</sub> [Fe(CN) <sub>5</sub> NO]<br>at 293 K | Fe1-C1 | 1.936(2)          | Fe1-C1-N1 | 179.0(9)       |
|                                                            | Fe1-C2 | 1.938(1)          | Fe1-C2-N2 | 180.0(5)       |
|                                                            | Fe1-N3 | 1.698(1)          | Fe1-N3-O1 | 180.00(2)      |
|                                                            | C1-N1  | 1.133(3)          | Fe2-N1-C1 | 173.04(5)      |
|                                                            | C2-N2  | 1.134(1)          | N4-Fe2-N4 | 180.00 (1)     |
|                                                            | N3-O1  | 1.122(1)          | N1-Fe2-N1 | 180.00 (1)     |
|                                                            | Fe2-N1 | 2.154(3)          | N1-Fe2-N1 | 99.08(3)       |
|                                                            | Fe2-N4 | 1.847(1)          | N1-Fe2-N1 | 80.92(4)       |
| Fe(4EPy) <sub>2</sub> [Fe(CN) <sub>5</sub> NO]<br>at 190 K | Fe1-C1 | 1.933(4)          | Fe1-C1-N1 | 178.97(7)      |
|                                                            | Fe1-C2 | 1.936(1)          | Fe1-C2-N2 | 180.0(5)       |
|                                                            | Fe1-N3 | 1.688(1)          | Fe1-N3-O1 | 180.00(2)      |
|                                                            | C1-N1  | 1.134(1)          | Fe2-N1-C1 | 172.63(7)      |
|                                                            | C2-N2  | 1.135(1)          | N4-Fe2-N4 | 180.00 (1)     |
|                                                            | N3-O1  | 1.115(2)          | N1-Fe2-N1 | 180.00 (1)     |
|                                                            | Fe2-N1 | 1.964(1)          | N1-Fe2-N1 | 99.85(4)       |
|                                                            | Fe2-N4 | 1.813(1)          | N1-Fe2-N1 | 80.15(4)       |

Table S6. Data collection of the frequency for the  $\nu(\text{CN})$  and  $\nu(\text{NO})$  absorption bands at 77 K and 295 K, the difference between them, and the dimensionality of materials with spin-crossover.

| Ligand                                  | $\nu(\text{CN})$ ,<br>[ $\text{cm}^{-1}$ ] at<br>295 K | $\nu(\text{CN})$ ,<br>[ $\text{cm}^{-1}$ ] at<br>77 K | $\Delta$<br>$\nu(\text{CN})$ ,<br>[ $\text{cm}^{-1}$ ] | $\nu(\text{NO})$ ,<br>[ $\text{cm}^{-1}$ ]<br>at 295 K | $\nu(\text{NO})$ ,<br>[ $\text{cm}^{-1}$ ] at<br>77 K | $\Delta$<br>$\nu(\text{NO})$ ,<br>[ $\text{cm}^{-1}$ ] | Dimensionality |
|-----------------------------------------|--------------------------------------------------------|-------------------------------------------------------|--------------------------------------------------------|--------------------------------------------------------|-------------------------------------------------------|--------------------------------------------------------|----------------|
| Pyrazine                                | 2176                                                   | 2188                                                  | 12                                                     | 1921                                                   | 1923                                                  | 2                                                      | 3D             |
| 4,4'-Azopyridine                        | 2171                                                   | 2188                                                  | 17                                                     | 1926                                                   | 1933                                                  | 7                                                      | 3D             |
| Pyridine                                | 2176                                                   | 2181                                                  | 5                                                      | 1929                                                   | 1932                                                  | 3                                                      | 2D             |
| 3-Fluoropyridine                        | 2176                                                   | 2181                                                  | 5                                                      | 1897                                                   | 1899                                                  | 2                                                      | 2D             |
| 4-Methylpyridine                        | 2179                                                   | 2184                                                  | 5                                                      | 1934                                                   | 1936                                                  | 2                                                      | 2D             |
| 4-Pyridinecarboxaldehyde                | 2179                                                   | 2185                                                  | 6                                                      | 1936                                                   | 1938                                                  | 2                                                      | 2D             |
| 4-Acetylpyridine                        | 2168                                                   | 2173                                                  | 5                                                      | 1898                                                   | 1904                                                  | 6                                                      | 2D             |
| 4-Vinylpyridine                         | 2175                                                   | 2180                                                  | 5                                                      | 1926                                                   | 1933                                                  | 7                                                      | 2D             |
| 4-(3-Phenylpropyl)propyl<br>Quinazoline | 2174                                                   | 2183                                                  | 9                                                      | 1915                                                   | 1920                                                  | 5                                                      | 2D             |
| 4-Chloropyridine                        | 2175                                                   | 2180                                                  | 5                                                      | 1918                                                   | 1922                                                  | 4                                                      | 2D             |
| 4-Iodopyridine                          | 2181                                                   | 2186                                                  | 5                                                      | 1899                                                   | 1903                                                  | 4                                                      | 2D             |
| 4-Bromopyridine                         | 2173                                                   | 2178                                                  | 5                                                      | 1903                                                   | 1907                                                  | 4                                                      | 2D             |
| 4-Ethynylpyridine                       | 2179                                                   | 2184                                                  | 5                                                      | 1900                                                   | 1902                                                  | 2                                                      | 2D             |
| 4-Ethynylpyridine                       | 2179                                                   | 2188                                                  | 9                                                      | 1910                                                   | 1916                                                  | 6                                                      | 2D             |

Table S7. Data collection of the frequency for the  $\nu(\text{CN})$  and  $\nu(\text{NO})$  absorption bands at 77 K and 295 K, the difference between them, and the dimensionality of materials without spin-crossover.

| Ligand                   | $\nu(\text{CN})$ [ $\text{cm}^{-1}$ ]<br>at 295 K | $\nu(\text{CN})$ ,<br>[ $\text{cm}^{-1}$ ]<br>at 77 K | $\Delta$ $\nu(\text{CN})$ ,<br>[ $\text{cm}^{-1}$ ] | $\nu(\text{NO})$ ,<br>[ $\text{cm}^{-1}$ ] at<br>295 K | $\nu(\text{NO})$ ,<br>[ $\text{cm}^{-1}$ ]<br>at 77 K | $\Delta$ $\nu(\text{NO})$ ,<br>[ $\text{cm}^{-1}$ ] | Dimensionality |
|--------------------------|---------------------------------------------------|-------------------------------------------------------|-----------------------------------------------------|--------------------------------------------------------|-------------------------------------------------------|-----------------------------------------------------|----------------|
| 1,2-Bis(4-pyridyl)ethane | 2175                                              | 2178                                                  | 3                                                   | 1912                                                   | 1915                                                  | 3                                                   | 3D             |
| 3-Methylpyridine         | 2173                                              | 2175                                                  | 2                                                   | 1916                                                   | 1919                                                  | 3                                                   | 2D             |
| 3-Pyridinecarboxaldehyde | 2173                                              | 2176                                                  | 3                                                   | 1921                                                   | 1924                                                  | 3                                                   | 2D             |
| 4-Phenylpyridine         | 2166                                              | 2168                                                  | 2                                                   | 1909                                                   | 1912                                                  | 3                                                   | 2D             |
| Isoquinoline             | 2169                                              | 2172                                                  | 3                                                   | 1901                                                   | 1904                                                  | 3                                                   | 2D             |



|                                |      |      |   |      |      |   |    |
|--------------------------------|------|------|---|------|------|---|----|
| <b>1-vinyl-1,2,4-triazole</b>  | 2177 | 2180 | 3 | 1922 | 1927 | 5 | 2D |
| <b>4-Ethylpyridine</b>         | 2168 | 2171 | 3 | 1901 | 1905 | 4 | 2D |
| <b>Imidazo [1,2-a]pyridine</b> | 2166 | 2169 | 3 | 1917 | 1920 | 3 | 2D |
| <b>Imidazo [1,2-a]pyrazine</b> | 2153 | 2155 | 2 | 1925 | 1928 | 5 | 2D |
| <b>3-Cyanopyridine</b>         | 2173 | 2175 | 2 | 1934 | 1937 | 3 | 2D |
| <b>3-Hidroxy pyridine</b>      | 2174 | 2177 | 3 | 1924 | 1929 | 5 | 2D |
| <b>Imidazole</b>               | 2183 | 2186 | 3 | 1939 | 1946 | 7 | 2D |
| <b>Isonicotinic Acid</b>       | 2169 | 2172 | 3 | 1925 | 1928 | 3 | 2D |
| <b>EthylNicotinate</b>         | 2169 | 2172 | 3 | 1911 | 1917 | 6 | 2D |

Table S8. Mössbauer quadrupole splitting ( $\Delta_{Qs}$ ) in pillared ferrous nitroprussides with thermally-induced spin-crossover.

| <b>Ligand</b>                   | <b>T (K)</b> | <b><math>\Delta_{Qs}</math>( mm/s)</b> | <b><math>\delta^*</math>( mm/s)</b> | <b>Reference</b> |
|---------------------------------|--------------|----------------------------------------|-------------------------------------|------------------|
| <b>Pyridine</b>                 | 295          | 1.812                                  | -0.083                              | [a]              |
|                                 | 5            | 1.796                                  | -0.016                              | [a]              |
| <b>3-Fluoropyridine</b>         | 295          | 1.813                                  | -0.021                              | [b]              |
|                                 | 5            | 1.805                                  | 0.067                               | [b]              |
| <b>4-Acetylpyridine</b>         | 295          | 1.833                                  | 0.017                               | [c]              |
|                                 | 5            | 1.762                                  | 0.070                               | [c]              |
| <b>4-Pyridinecarboxaldehyde</b> | 295          | 1.901                                  | -0.021                              | [c]              |
|                                 | 5            | 1.892                                  | 0.075                               | [c]              |
| <b>4-Methylpyridine</b>         | 295          | 1.875                                  | -0.047                              | [c]              |
|                                 | 5            | 1.587                                  | 0.059                               | [c]              |
| <b>4-Vinylpyridine</b>          | 295          | 1.862                                  | -0.038                              | [c]              |
|                                 | 5            | 1.847                                  | 0.072                               | [c]              |
| <b>4-Chloropyridine</b>         | 295          | 1.798                                  | -0.039                              | [d]              |
|                                 | 5            | 1.489                                  | 0.068                               | [d]              |
| <b>4-Bromopyridine</b>          | 295          | 1.823                                  | -0.010                              | [d]              |
|                                 | 5            | 1.513                                  | 0.021                               | [d]              |
| <b>4-Iodopyridine</b>           | 295          | 1.807                                  | -0.023                              | [d]              |
|                                 | 5            | 1.542                                  | 0.014                               | [d]              |
| <b>Quinazoline</b>              | 295          | 1.578                                  | 0.040                               | Figure S6        |
|                                 | 5            | 1.457                                  | 0.041                               | Figure S6        |
| <b>4-Ethynylpyridine</b>        | 295          | 1.607                                  | 0.013                               | Figure 3         |
|                                 | 5            | 1.461                                  | 0.020                               | Figure 3         |

References: [a] *Eur. J. Inorg. Chem.*, **2019**, 4966–4973. <https://doi.org/10.1002/ejic.201900837>; [b] *J. Solid State Chem.* **2020**, 286, 121293. <https://doi.org/10.1016/j.jssc.2020.121293>; [c] *New J Chem.* **2020**, 44, 5937–46. <https://doi.org/10.1039/D0NJ00595A>; [d] *New J Chem.* **2022**, 47, 238-249. <https://doi.org/10.1039/D2NJ05141A>

Table S9. Mössbauer quadrupole splitting ( $\Delta_{QS}$ ) in pillared ferrous nitroprussides without thermally induced spin-crossover.

| Ligand                   | T (K) | $\Delta_{QS}$ (mm/s) | $\delta^*$ (mm/s) | Reference |
|--------------------------|-------|----------------------|-------------------|-----------|
| 3-Chloropyridine         | 295   | 1.808                | -0.064            | [b]       |
|                          | 5     | 1.858                | 0.076             | [b]       |
| 3-Bromopyridine          | 295   | 1.848                | 0.024             | [b]       |
|                          | 5     | 1.851                | 0.075             | [b]       |
| 3-Iodopyridine           | 295   | 1.807                | -0.023            | [b]       |
|                          | 5     | 1.836                | 0.065             | [b]       |
| 1,3-Oxazole              | 295   | 1.772                | -0.013            | [e]       |
|                          | 5     | 1.848                | 0.002             | [e]       |
| 1H-Pyrazole              | 295   | 1.860                | -0.014            | [e]       |
|                          | 5     | 1.879                | 0.088             | [e]       |
| Imidazo [1,2-a]pyridine  | 295   | 1.789                | -0.129            | [e]       |
|                          | 5     | 1.850                | -0.003            | [e]       |
| 1,2-Bis(4-pyridyl)ethane | 295   | 1.885                | -0.021            | [e]       |
|                          | 5     | 1.903                | 0.057             | [e]       |
| 4-Phenylpyridine         | 295   | 1.794                | -0.045            | Figure S7 |
|                          | 5     | 1.826                | -0.013            | Figure S7 |
| 4-Styrylpyridine         | 295   | 1.757                | -0.071            | Figure S8 |
|                          | 5     | 1.827                | 0.022             | Figure S8 |
| 1,10-Phenanthroline      | 295   | 1.638                | -0.158            | Figure S9 |
|                          | 5     | 1.733                | -0.047            | Figure S9 |

References: [b] *J. Solid State Chem.* **2020**, 286, 121293. <https://doi.org/10.1016/j.jssc.2020.121293>;  
[e] *J Coord Chem* **2021**, 434, 213764. <https://doi.org/10.1080/00958972.2020.1870682>
